# Supplementary material
Source: PubMed Central journal article supplement (PMC3067200)
Supplement: supp_77_4_1483__1.pdf [file supp_77_4_1483__1.pdf]

Table S1. Multiplex PCR primers for Luminex® plasmid detection.

| <b>Pool 1 PCR Primers</b> |               |                                         |        |    |                |                     |                  |
|---------------------------|---------------|-----------------------------------------|--------|----|----------------|---------------------|------------------|
| Primer Name               | Replicon      | Primer Sequence (5' - 3')               | Length | Tm | Product Length | Genbank coordinates | Unique           |
| 5476                      | Ip36, F       | ATTAAGCACAAATGTATGGCCATTGCTGCATTCT      | 35     | 68 | 361            | 5294-5654           | yes              |
| 5477                      | Ip36, R       | TGCAGCCAAAAGTAATTTGAAGAATGGACTAAAGA     | 35     | 65 |                |                     | no               |
| 5472                      | Ip28-4, F     | GGGAAATGAGTCAAAAATAAATACCCCAAATGAAA     | 35     | 65 | 437            | 2598-3034           | yes              |
| 5473                      | Ip28-4, R     | CAGTGTTTGCTTTAAATTTTTAGGGTGTCTGGA       | 35     | 66 |                |                     | yes              |
| 5470                      | Ip28-3, F     | GAAGGAGAAGCGGGTGGGCAATAAAATT            | 28     | 65 | 473            | 12113-12585         | yes              |
| 5471                      | Ip28-3, R     | TGGGCAAAATCTTTTTACTAATAAGCCACTCTTGG     | 35     | 65 |                |                     | yes              |
| 5484                      | cp32-7, F     | GCGACAAATTCACCATTAAATTTAAAGGGATTCTT     | 35     | 65 | 500            | 8974-9473           | no               |
| 5485                      | cp32-7, R     | TTTAGCAAATCCATACATAAATCCAATAAGCCCG      | 34     | 65 |                |                     | yes              |
| 5492                      | cp32-3, F     | TTTGTTTTGATAATTTCTTGCAAGATTGATGCGAG     | 35     | 66 | 527            | 26747-27273         | yes              |
| 5493                      | cp32-3, R     | GGCTCTGCTAGCTTTTCAAGTTCTTCCCTCAATATT    | 35     | 65 |                |                     | yes              |
| 5500                      | Chromosome, F | ATCTAAGCAATGACAAAACATATTGGGGAACTTGA     | 35     | 65 | 582            | 147651-148232       | yes              |
| 5501                      | Chromosome, R | AAAATGTAAGAACAGCTGAAGAGCTTGAATGC        | 33     | 65 |                |                     | yes              |
| 5486                      | cp32-1, F     | CCTAAAATAATAACAATAGCGTCAATTAAGGGCGG     | 35     | 65 | 606            | 20781-21386         | no               |
| 5487                      | cp32-1, R     | CCCCAAAACCTTTTCTTTTTTTGCAACATTTCTA      | 35     | 65 |                |                     | yes              |
| 5488                      | Ip56, F       | CATTTATCCGAAATTTGAGAAGTAACCAAAGCATG     | 35     | 65 | 662            | 41115-41776         | yes              |
| 5489                      | Ip56, R       | GACATTCAAACTGGGGTTGCAATTGCTATTTT        | 32     | 65 |                |                     | yes              |
| <b>Pool 2 PCR Primers</b> |               |                                         |        |    |                |                     |                  |
| Primer Name               | Replicon      | Primer Sequence (5' - 3')               | Length | Tm | Product Length | Genbank coordinates | Unique           |
| 5455                      | Ip54, F       | AGCCTTAATAGCATGTAAGCAAAATGTTAGCAGCC     | 35     | 66 | 263            | 9428-9690           | yes              |
| 5456                      | Ip54, R       | CAAGTGTGGTTTGACCTAGATCGTCAGAAATTGTT     | 35     | 66 |                |                     | yes              |
| 5482                      | cp32-9, F     | ACCTAAAATAATAACAATAGCGTCAATCAAGGGCG     | 35     | 65 | 401            | 20831-21231         | no               |
| 5483                      | cp32-9, R     | GATGTCCTAAGCTGGGATTTGATCGATTATCACA      | 35     | 65 |                |                     | yes              |
| 5459                      | cp9, F        | TAGCATGGAGTGCAATAGGACTGGTATTTACTCCG     | 35     | 67 | 285            | 6355-6639           | yes              |
| 5460                      | cp9, R        | AGGCCGATGAAGTTGCATTTAAACATTGTAGAG       | 33     | 65 |                |                     | yes              |
| 5480                      | cp32-6, F     | TTATTTGTGCTATTTTGGCGTGATAGTTTCTTGC      | 35     | 66 | 521            | 26276-26803         | no               |
| 5481                      | cp32-6, R     | TTATTCCAATTGCAGATTCAACTTGACCCCTAAGT     | 35     | 65 |                |                     | yes              |
| 5496                      | Ip21, F       | CCAAATATTTTAAACAATAGCAAGTTTGAAGGGCGG    | 35     | 65 | 639            | 2880-3518           | yes              |
| 5497                      | Ip21, R       | TGAAAAATGAATCTTGCCCTTGACATAACTACCAT     | 35     | 65 |                |                     | yes              |
| 5474                      | Ip38, F       | TTCACTTAATTTAAAATCCCAACTTGGTTTGGGA      | 35     | 65 | 382            | 19396-19777         | yes              |
| 5475                      | Ip38, R       | TCTATCCTTTGCCTTTGTCTCCAGACATATAT        | 34     | 65 |                |                     | yes              |
| 5601                      | Ip28-1, F     | AATTGTCACCTAATTATGGGTTGAGCATTCTCTTG     | 35     | 65 | 278            | 10643-10920         | yes              |
| 5602                      | Ip28-1, R     | GTCAAGCAATAATGCTGAAAACAAAATGGATGATA     | 35     | 65 |                |                     | yes              |
| 5536                      | Ip25, F       | ATTATTAAGCTTTTGGGGCATCATTTTGATTTT       | 35     | 65 | 700            | 19443-20142         | Yes              |
| 5537                      | Ip25, R       | TCGCTACAAATTTTCTTTCAATATTGACTTGGC       | 35     | 65 |                |                     | Yes              |
| <b>Pool 3 PCR Primers</b> |               |                                         |        |    |                |                     |                  |
| Primer Name               | Replicon      | Primer Sequence (5' - 3')               | Length | Tm | Product Length | Genbank coordinates | Unique           |
| 5569                      | Ip17          | TGTTGTTGTGATTGATCTTCAATTTTATTGATGGC     | 35     | 65 | 552            | 11051-11602         | yes              |
| 5570                      | Ip17          | GGGCATAAAAGGAACTTTCTTTGGAAATTCCTCAAT    | 35     | 66 |                |                     | yes              |
| 5457                      | cp26, F       | TTACTTAGCATTGCAAATAAAAACGGAATGAAACC     | 35     | 69 | 389            | 4919-5307           | yes              |
| 5458                      | cp26, R       | GCGGCTGTTGGGATTGAATAATGTTAAATATTTT      | 35     | 65 |                |                     | yes              |
| 5490                      | cp32-4, F     | TGATGTAAGTAAAGATTTAGAAAGGGGCGGTGA       | 35     | 65 | 415            | 26918-27332         | yes              |
| 5491                      | cp32-4, R     | CGTTACTCCAGTTGCAGATTGAGCTTTGGTTTT       | 32     | 66 |                |                     | yes              |
| 5478                      | cp32-8, F     | ACCTAAAATAATAACAATAGCGTCAATCAAGGGCGG    | 35     | 65 | 451            | 20754-21204         | no               |
| 5479                      | cp32-8, R     | TGCCGTCATTGGAAGTATTACACAATTGCTAGTTA     | 35     | 66 |                |                     | yes              |
| 5468                      | Ip28-2, F     | ATGTGACATTTTTGATGTACACAAAGCTTGCATCT     | 35     | 65 | 515            | 20126-20640         | yes              |
| 5469                      | Ip28-2, R     | CAAAATAGGAATAAGCGACTATTTGTCTGGGGCT      | 34     | 66 |                |                     | yes              |
| 5609                      | Ip5, F        | GTGTTAACTTTAAAATCCCAAACCTTATAATTTGGGAAA | 40     | 64 | 738            | 163-900             | yes <sup>a</sup> |
| 5495                      | Ip5, R        | CGTTAAAAGTAAACGCACGGCGTATAAACCC         | 31     | 66 |                |                     | yes              |
| 4596                      | Ip25, F       | TTGCTGCCATTTCTCACTTGGTAA                | 24     | 68 | 177            | 9783-9959           | yes              |
| 4597                      | Ip25, R       | ATAAAAGCGACAGGTTATCGTGACG               | 25     | 67 |                |                     | yes              |
| 5466                      | Ip28-1, F     | CTTCAACACTTATCAAAAAGTGAAGACCAAGCCAA     | 35     | 66 | 540            | 590-1129            | yes              |
| 5467                      | Ip28-1, R     | CCCCGATATTTCTTTGGTGTCTTTTGAATTTA        | 35     | 65 |                |                     | yes              |

<sup>a</sup> Primer matches Ip21 and Ip28-4 at 39/40 positions.

Table S2. ASPE primers for Luminex® plasmid detection.

**Pool 1 ASPE primers**

| Primer No. | TAG | Sequence (5'-3') <sup>a</sup>                                | Replicon   | Primer <sup>b</sup> length | Genbank Coordinates | Unique |
|------------|-----|--------------------------------------------------------------|------------|----------------------------|---------------------|--------|
| 5523       | 14  | <u>CTACTATACATCTTACTATACTTTTT</u> TTGGGTACTTTTATCACC         | lp36       | 20/44                      | 5553-5572           | Yes    |
| 5524       | 20  | <u>CTTTTACAATACTTCAATACAATCAA</u> AAATAAATACGGCCCTTTGGACAAGC | lp28-4     | 27/51                      | 2806-2832           | Yes    |
| 5558       | 34  | <u>TCATTATATACATACCAATTCATTA</u> ATTTTAATAGTTGGTTGCGACTGGGG  | lp28-3     | 28/52                      | 12160-12187         | Yes    |
| 5526       | 52  | <u>TCAATCATCTTTATACTTCACAATGG</u> TAGTGCTTTAGGAAATGTCATTGGCA | cp32-7     | 28/52                      | 9390-9417           | Yes    |
| 5527       | 55  | <u>TATATACACTTCTCAATAACTAACT</u> CCCACGATAACACACCCGTATTA AAA | cp32-3     | 27/51                      | 26903-26929         | Yes    |
| 5555       | 61  | <u>AATCTTACCAATTCATAATCTTCA</u> AGCCTGCGCAATCATTGCCA         | Chromosome | 20/44                      | 147688-147707       | Yes    |
| 5529       | 59  | <u>TCATCAATCAATCTTTTTCACTTTA</u> AGCTTGCACACTTTTAGTGAAGAGCCC | cp32-1     | 28/52                      | 21053-21080         | Yes    |
| 5530       | 82  | <u>TACATACACTAATAACATACTCAT</u> CATATTTGTTCTTGCATCTTGTCTCTGG | lp56       | 28/52                      | 41395-41422         | Yes    |

**Pool 2 ASPE primers**

| Primer No. | TAG | Sequence (5'-3') <sup>a</sup>                                      | Replicon | Primer <sup>b</sup> length | Genbank Coordinates | Unique |
|------------|-----|--------------------------------------------------------------------|----------|----------------------------|---------------------|--------|
| 5584       | 2   | <u>CTTTATCAATACATACTACAATCAG</u> AAAAACAGCGTTTCAGTAGATTTGCCT       | lp54     | 28/52                      | 9470-9497           | Yes    |
| 5585       | 12  | <u>TACACTTTCTTTCTTTCTTTCTTT</u> TATTGATAATTGATAGTGATCCACAGGCCA     | cp32-9   | 30/54                      | 20929-20958         | Yes    |
| 5586       | 44  | <u>TCATTTACCAATCTTTCTTTATACT</u> CATCATTATCGTTTGCATTAATCTTTGG      | cp9      | 30/54                      | 6435-6464           | Yes    |
| 5587       | 68  | <u>TCATAATCTCAACAATCTTTCTTT</u> TTTTTTGGAGATTTAAAAAACAGAAAGCAA     | cp32-6   | 30/54                      | 26405-26434         | Yes    |
| 5588       | 77  | <u>CAATTAACTACATAACAATACATACT</u> GAAAGGGGGAGTTTCTTTTAATAATTGTG    | lp21     | 30/54                      | 3070-3099           | Yes    |
| 5589       | 80  | <u>CTAACTAACAATAATCTAACTAAC</u> TACGGGGAGCGGCAAGACAACCTTT          | lp38     | 25/49                      | 19440-19464         | Yes    |
| 5603       | 45  | <u>TCATTTACAATTCATTAATCAAT</u> TCAATGCAATATGAATAGTTTATTATAGGAATCCG | lp28-1   | 33/57                      | 10709-10741         | Yes    |
| 5538       | 24  | <u>TCAATTACCTTTTCAATACAATAC</u> AGCCAAAACAAGCTCAAAGATCCCC          | lp25     | 26/50                      | 19738-19763         | Yes    |

**Pool 3 ASPE primers**

| Primer No. | TAG | Sequence (5'-3') <sup>a</sup>                                     | Replicon | Primer <sup>b</sup> length | Genbank Coordinates | Unique |
|------------|-----|-------------------------------------------------------------------|----------|----------------------------|---------------------|--------|
| 5571       | 33  | <u>TCAATTACTTCACTTTAATCCTTT</u> TGGATAAATTATGAACCAACTGCAGAAGAA    | lp17     | 30/54                      | 11210-11180         | Yes    |
| 5550       | 36  | <u>CAATTCATTTCAATCACAATCAAT</u> GCTTGGCGCCTGGGCAATTAGATTA         | cp26     | 25/49                      | 5044-5068           | Yes    |
| 5551       | 42  | <u>CTATCTTCATATTTCACTATAAACT</u> CTCTCTCTTTTTTTCTTTTTTAAGCTCTCTGA | cp32-4   | 33/57                      | 27257-27225         | Yes    |
| 5552       | 47  | <u>CTTCTCATTAACTTACTTCATAAT</u> TGGGAAAAGTACGAGTTCAATAATATTGTC    | cp32-8   | 31/55                      | 20792-20822         | Yes    |
| 5553       | 51  | <u>TCATTTCAATCAATCATCAACAATA</u> CATAGACTGATGATCTGGCCTCTTCTTG     | lp28-2   | 29/53                      | 20164-20192         | Yes    |
| 5554       | 54  | <u>CTTTTTCAATCACTTTCAATTCAT</u> CCTCAGAAGACCAAAGGAATTAGAAATTACG   | lp28-1   | 32/56                      | 636-667             | Yes    |
| 5556       | 65  | <u>CTTTTCATCAATAATCTTACCTTT</u> CATGCATGCAGAATACTTATTCTTACCGCA    | lp5      | 30/54                      | 306-335             | Yes    |
| 5590       | 62  | <u>TCAATCATAATCTCATAATCCAAT</u> TTTTTCATGCTTTGAACTTTAGCATCTTCA    | lp25     | 30/54                      | 9811-9840           | Yes    |

<sup>a</sup> The xTAG sequence is underlined.

<sup>b</sup> The first number indicates the length of the sequence complementary to the plasmid-specific multiplex PCR product. The second number indicates the length of the entire ASPE primer (xTAG sequence plus primer sequence).

**Table S3.** Normalized MFI values used to determine replicon presence (positive) or absence (negative).

|                | <b>Negative (-)</b> | <b>Intermediate</b> | <b>Positive (+)</b> |
|----------------|---------------------|---------------------|---------------------|
| <b>BB147</b>   | ≤0.2                |                     | >0.2                |
| <b>cp9</b>     | ≤0.2                | >0.2-0.6            | >0.6                |
| <b>cp26</b>    | ≤0.2                | >0.2-0.5            | >0.5                |
| <b>cp32-1</b>  | ≤0.2                |                     | >0.2                |
| <b>cp32-3</b>  | ≤0.2                |                     | >0.2                |
| <b>cp32-4</b>  | ≤0.2                |                     | >0.2                |
| <b>cp32-6</b>  | ≤0.15               |                     | >0.15               |
| <b>cp32-7</b>  | ≤0.15               |                     | >0.15               |
| <b>cp32-8</b>  | ≤0.2                | >0.2-0.4            | >0.4                |
| <b>cp32-9</b>  | ≤0.2                | >0.2-0.5            | >0.5                |
| <b>lp5</b>     | ≤0.2                | >0.2-0.4            | >0.4                |
| <b>lp17</b>    | ≤0.2                | >0.2-0.4            | >0.4                |
| <b>lp21</b>    | ≤0.15               |                     | >0.15               |
| <b>lp25B</b>   | ≤0.2                |                     | >0.2                |
| <b>lp28-1A</b> | ≤0.2                | >0.2-0.55           | >0.55               |
| <b>lp28-2</b>  | ≤0.2                |                     | >0.2                |
| <b>lp28-3</b>  | ≤0.2                | >0.2-0.4            | >0.4                |
| <b>lp28-4</b>  | ≤0.2                |                     | >0.2                |
| <b>lp36</b>    | ≤0.2                | >0.2-0.4            | >0.4                |
| <b>lp38</b>    | ≤0.2                | >0.2-0.5            | >0.5                |
| <b>lp54</b>    | ≤0.2                |                     | >0.2                |
| <b>lp56</b>    | ≤0.2                |                     | >0.2                |

**TABLE S4.** Luminex® plasmid analysis assay results for 45 *B. burgdorferi* B31 clones, including 19 passage 5 clones previously characterized by PCR (B31-5A1 through B31-5A19; ref. 41), 25 additional passage 5 clones (B31-2597 through B31-2621), and 3 high passage clones (B31-312 through B31-314).

|          | BB147 | cp9 | cp26 | cp32-1 | cp32-3 | cp32-4 | cp32-6 | cp32-7 | cp32-8 | cp32-9 | lp5 | lp17 | lp21 | lp25 | lp28-1 | lp28-2 | lp28-3 | lp28-4 | lp36 | lp38 | lp54 | lp56 |     |
|----------|-------|-----|------|--------|--------|--------|--------|--------|--------|--------|-----|------|------|------|--------|--------|--------|--------|------|------|------|------|-----|
| B31-5A1  | +     | +   | +    | +      | +      | +      | +      | +      | +      | +      | -   | +    | +    | +    | +      | +      | +      | +      | +    | +    | +    | -    |     |
| B31-5A2  | +     | -   | +    | +      | +      | +      | +      | +      | +      | +      | -   | +    | +    | +    | -      | +      | +      | +      | +    | +    | +    | +    | -   |
| B31-5A3  | +     | +   | +    | +      | -      | +      | +      | +      | +      | +      | +   | +    | +    | +    | +      | -      | +      | +      | +    | +    | +    | +    | -   |
| B31-5A4  | +     | +   | +    | +      | +      | +      | +      | +      | +      | +      | -   | +    | +    | +    | +      | +      | +      | +      | +    | +    | +    | +    | +   |
| B31-5A5  | +     | +   | +    | +      | +      | +      | +      | +      | +      | +      | +   | +    | +    | -    | -      | +      | +      | +      | +    | +    | +    | +    | +   |
| B31-5A6  | +     | -   | +    | +      | +      | +      | +      | +      | +      | +      | +   | +    | +    | +    | +      | +      | +      | -      | +    | +    | +    | +    | +   |
| B31-5A7  | +     | +   | +    | +      | +      | +      | +      | +      | +      | +      | -   | +    | +    | -    | -      | +      | +      | +      | +    | +    | +    | +    | +   |
| B31-5A8  | +     | +   | +    | +      | +      | +      | +      | +      | +      | +      | +   | +    | +    | +    | -      | +      | +      | +      | +    | +    | +    | +    | +   |
| B31-5A9  | +     | +   | +    | +      | +      | +      | +      | +      | +      | +      | -   | +    | +    | +    | +      | +      | +      | +      | +    | +    | +    | +    | -   |
| B31-5A10 | +     | +   | +    | +      | +      | +      | +      | +      | +      | +      | +   | +    | +    | -    | +      | +      | +      | +      | +    | +    | +    | +    | -   |
| B31-5A11 | +     | +   | +    | +      | +      | +      | +      | +      | +      | +      | -   | +    | +    | +    | +      | +      | +      | +      | +    | +    | +    | +    | +   |
| B31-5A12 | +     | +   | +    | +      | +      | +      | +      | +      | +      | +      | +   | +    | +    | -    | -      | +      | +      | -      | +    | +    | +    | +    | +   |
| B31-5A13 | +     | +   | +    | +      | +      | +      | +      | +      | +      | +      | +   | +    | +    | -    | +      | +      | +      | +      | +    | +    | +    | +    | +   |
| B31-5A14 | +     | +   | +    | +      | +      | +      | +      | +      | +      | +      | +   | +    | +    | -    | +      | +      | +      | +      | +    | +    | +    | +    | -   |
| B31-5A15 | +     | -   | +    | +      | +      | +      | +      | +      | +      | +      | +   | +    | -    | +    | +      | +      | +      | +      | +    | +    | +    | +    | +   |
| B31-5A16 | +     | +   | +    | +      | +      | +      | +      | +      | +      | +      | -   | +    | +    | +    | +      | +      | +      | +      | +    | +    | +    | +    | -   |
| B31-5A17 | +     | +   | +    | +      | +      | +      | +      | +      | +      | +      | -   | +    | +    | -    | -      | +      | +      | +      | +    | +    | +    | +    | +   |
| B31-5A18 | +     | +   | +    | +      | +      | +      | +      | +      | +      | +      | +   | +    | +    | +    | +      | +      | +      | -      | +    | +    | +    | +    | -   |
| B31-5A19 | +     | +   | +    | +      | +      | +      | +      | +      | +      | +      | -   | +    | +    | +    | +      | +      | +      | +      | +    | +    | +    | +    | +   |
| B31-2597 | +     | +   | +    | +      | +      | +      | +      | +      | +      | +      | +   | +    | +    | +    | +      | +      | +      | +      | +    | +    | +    | +    | +   |
| B31-2598 | +     | +   | +    | +      | +      | +      | +      | +      | +      | -      | -   | +    | +    | -    | +      | +      | +      | +      | +    | +    | +    | +    | +   |
| B31-2599 | +     | +   | +    | +      | +      | +      | +      | +      | +      | +      | +   | +    | +    | +    | +      | +      | +      | +      | +    | +    | +    | +    | +   |
| B31-2600 | +     | +   | +    | +      | +      | +      | +      | +      | +      | +      | -   | +    | +    | +    | +      | +      | +      | +      | +    | +    | +    | +    | -   |
| B31-2601 | +     | +   | +    | +      | +      | +      | +      | +      | +      | +      | +   | +    | +    | +    | -      | +      | +      | +      | +    | +    | +    | +    | -   |
| B31-2602 | +     | +   | +    | +      | +      | +      | +      | +      | +      | +      | -   | +    | +    | -    | -      | +      | +      | -      | +    | +    | +    | +    | +   |
| B31-2603 | +     | +   | +    | +      | -      | +      | +      | +      | +      | +      | -   | +    | +    | +    | int    | +      | +      | +      | +    | +    | +    | +    | +   |
| B31-2604 | +     | +   | +    | +      | +      | +      | +      | +      | +      | +      | +   | +    | +    | +    | +      | +      | +      | +      | +    | +    | +    | +    | +   |
| B31-2605 | +     | +   | +    | +      | +      | +      | +      | +      | +      | +      | +   | +    | +    | +    | +      | +      | +      | +      | +    | +    | +    | +    | -   |
| B31-2606 | +     | +   | +    | +      | +      | +      | +      | +      | +      | +      | int | +    | +    | -    | +      | +      | +      | +      | +    | +    | +    | +    | +   |
| B31-2607 | +     | -   | +    | +      | +      | +      | +      | +      | +      | +      | +   | +    | +    | +    | +      | -      | +      | +      | +    | +    | +    | +    | +   |
| B31-2608 | +     | +   | +    | +      | +      | +      | +      | +      | +      | +      | +   | +    | +    | +    | +      | -      | +      | +      | +    | +    | +    | +    | +   |
| B31-2609 | +     | +   | +    | +      | +      | +      | +      | +      | +      | +      | +   | +    | +    | +    | int    | +      | +      | +      | +    | +    | +    | +    | -   |
| B31-2610 | +     | +   | +    | +      | +      | +      | +      | +      | +      | +      | -   | +    | +    | +    | +      | +      | +      | +      | +    | +    | +    | +    | +   |
| B31-2611 | +     | +   | +    | +      | +      | +      | +      | +      | +      | +      | +   | +    | +    | +    | +      | +      | +      | +      | +    | +    | +    | +    | -   |
| B31-2612 | +     | -   | +    | +      | +      | +      | +      | +      | +      | +      | -   | +    | -    | +    | +      | +      | +      | +      | +    | +    | +    | +    | +   |
| B31-2613 | +     | -   | +    | +      | +      | +      | +      | +      | +      | +      | +   | +    | +    | +    | +      | +      | +      | +      | +    | +    | +    | +    | -   |
| B31-2614 | +     | +   | +    | +      | +      | +      | +      | +      | +      | +      | +   | +    | +    | +    | -      | +      | +      | +      | +    | +    | +    | +    | +   |
| B31-2615 | +     | +   | +    | +      | +      | +      | +      | +      | +      | +      | int | +    | +    | +    | -      | +      | +      | +      | +    | +    | +    | +    | +   |
| B31-2616 | +     | +   | +    | +      | +      | +      | +      | +      | +      | +      | int | +    | +    | +    | +      | +      | +      | +      | +    | +    | +    | +    | +   |
| B31-2617 | +     | +   | +    | +      | +      | +      | +      | +      | +      | +      | +   | +    | +    | +    | +      | +      | +      | +      | +    | +    | +    | +    | int |
| B31-2618 | +     | +   | +    | +      | +      | +      | +      | +      | +      | +      | +   | +    | +    | +    | +      | +      | +      | +      | +    | +    | +    | +    | +   |
| B31-2619 | +     | +   | +    | +      | +      | +      | +      | +      | +      | +      | +   | +    | +    | +    | -      | -      | +      | -      | +    | +    | +    | +    | +   |
| B31-2620 | +     | +   | +    | +      | +      | +      | +      | +      | +      | +      | -   | +    | +    | +    | +      | +      | +      | +      | +    | +    | +    | +    | +   |
| B31-2621 | +     | +   | +    | +      | +      | +      | +      | +      | +      | +      | -   | +    | +    | +    | +      | +      | +      | +      | +    | +    | +    | +    | int |
| B31-312  | +     | -   | +    | +      | +      | -      | -      | +      | -      | -      | -   | -    | -    | -    | -      | -      | -      | -      | -    | -    | -    | +    | -   |
| B31-313  | +     | -   | +    | +      | +      | -      | -      | +      | -      | -      | -   | +    | -    | -    | -      | -      | -      | -      | -    | -    | -    | -    | -   |
| B31-314  | +     | -   | +    | +      | +      | -      | -      | +      | -      | -      | -   | -    | -    | -    | -      | -      | -      | -      | -    | -    | +    | +    | -   |

Fig. S1

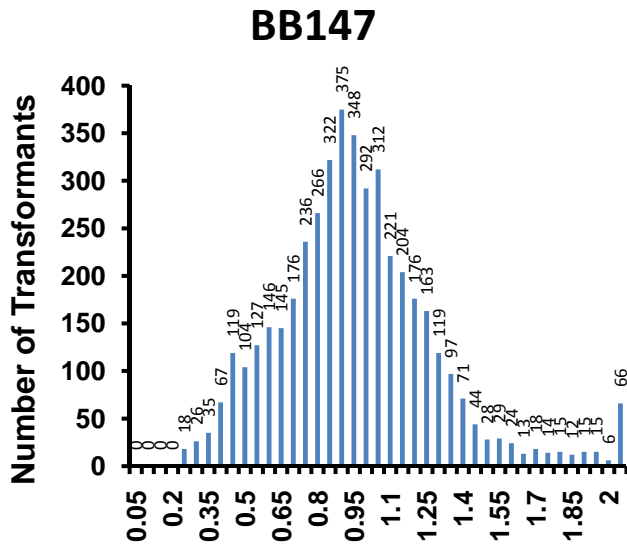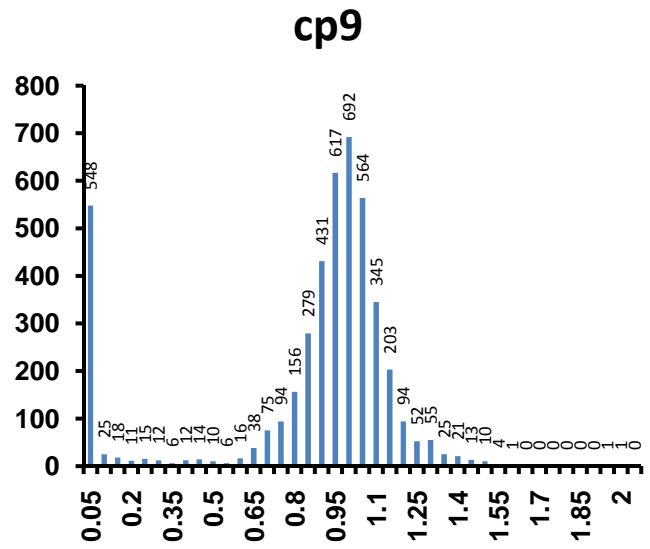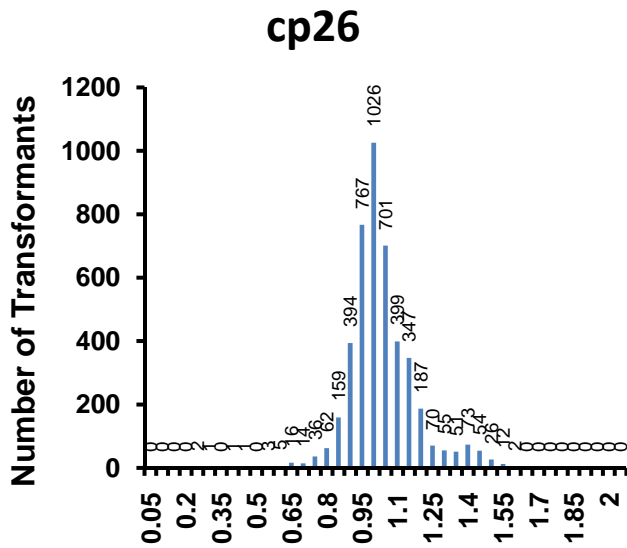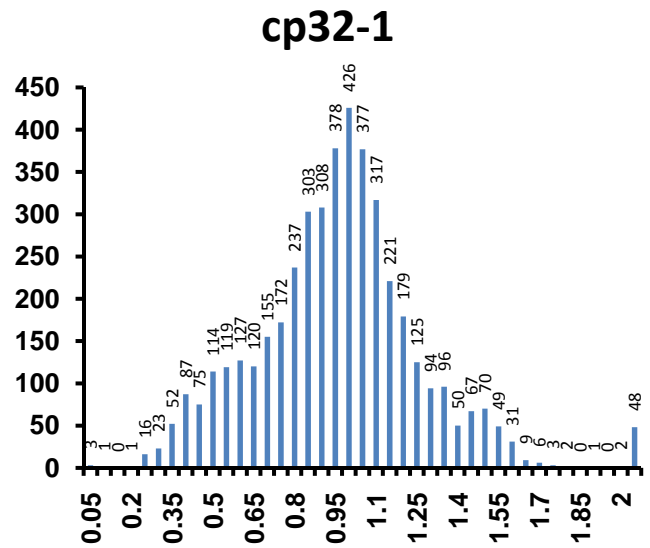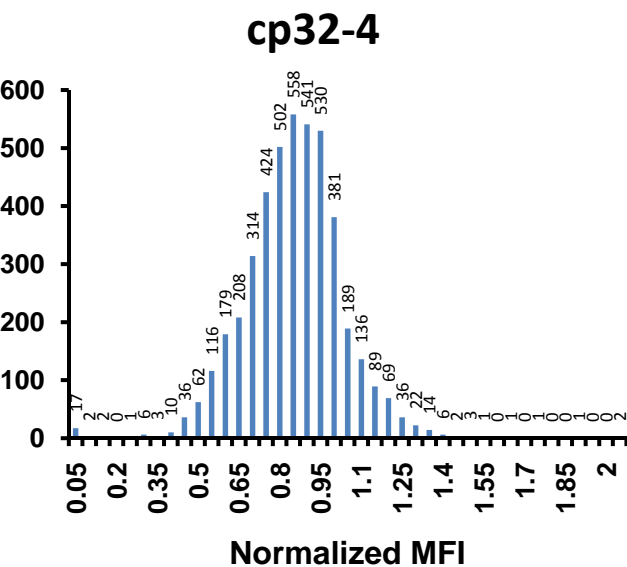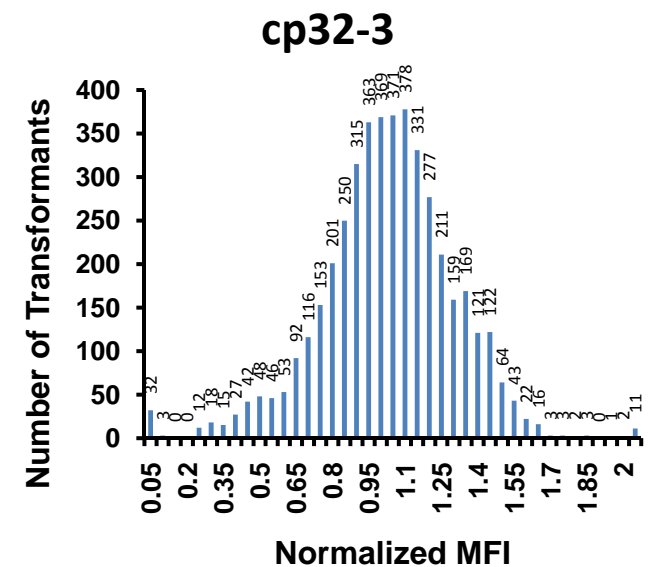

Fig. S1 (cont.)

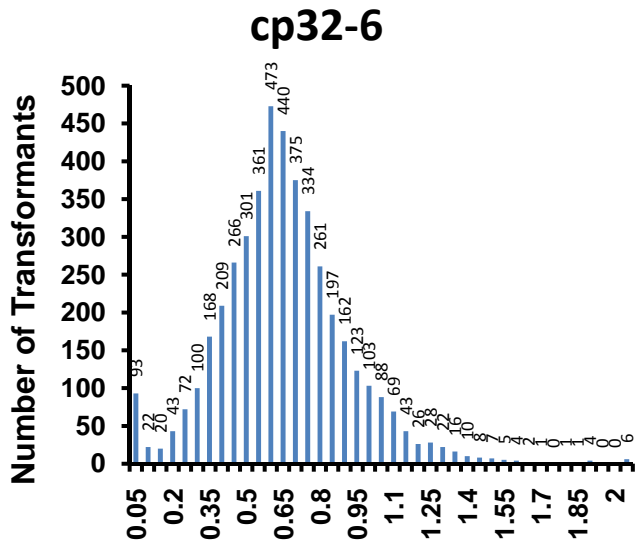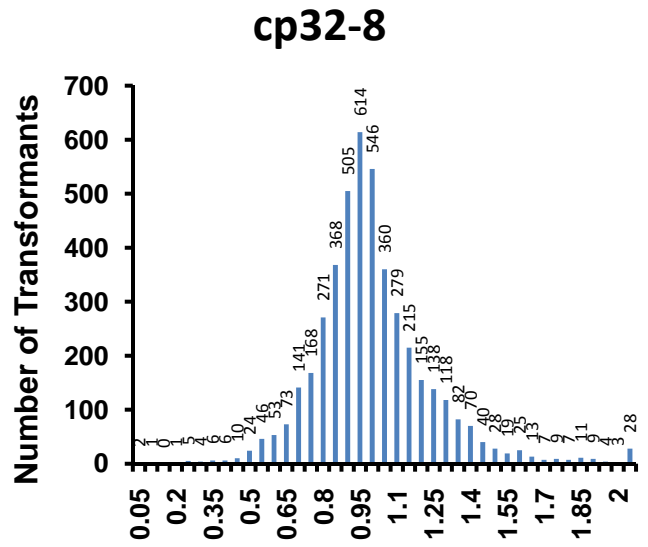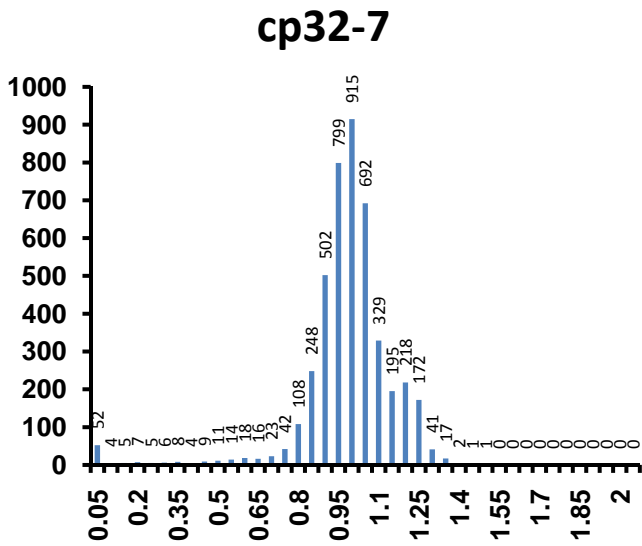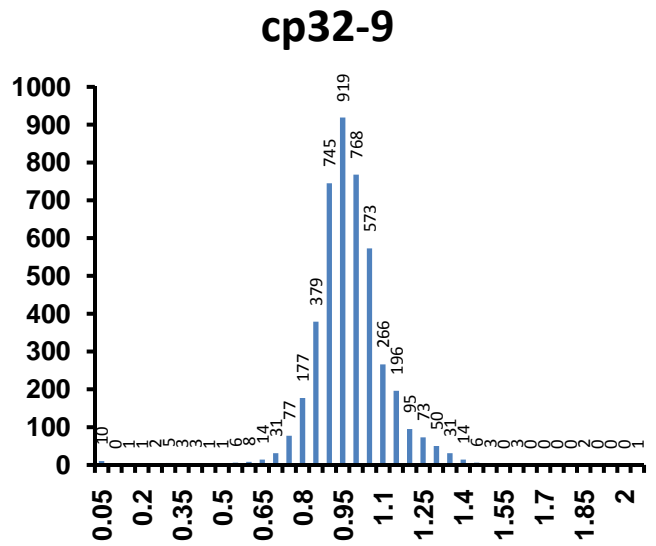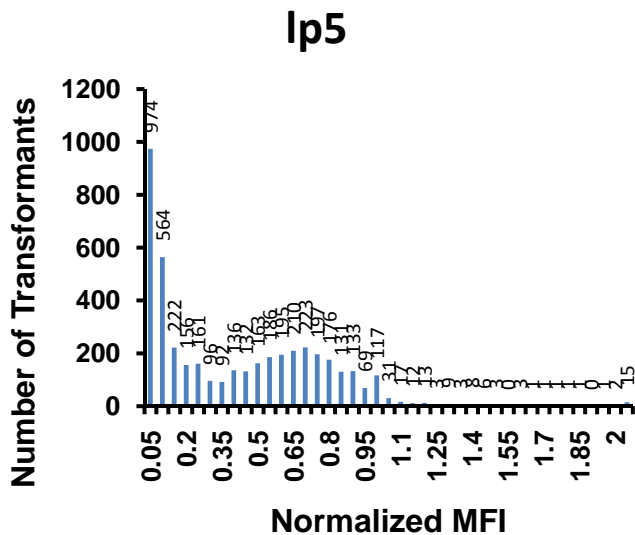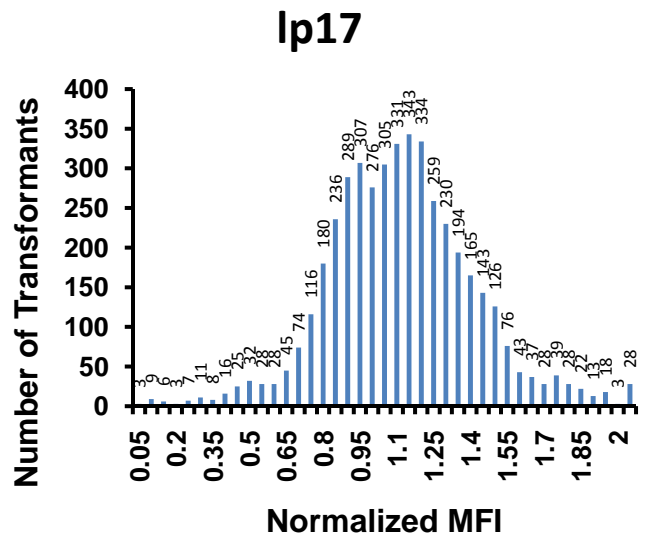

Fig. S1 (cont.)

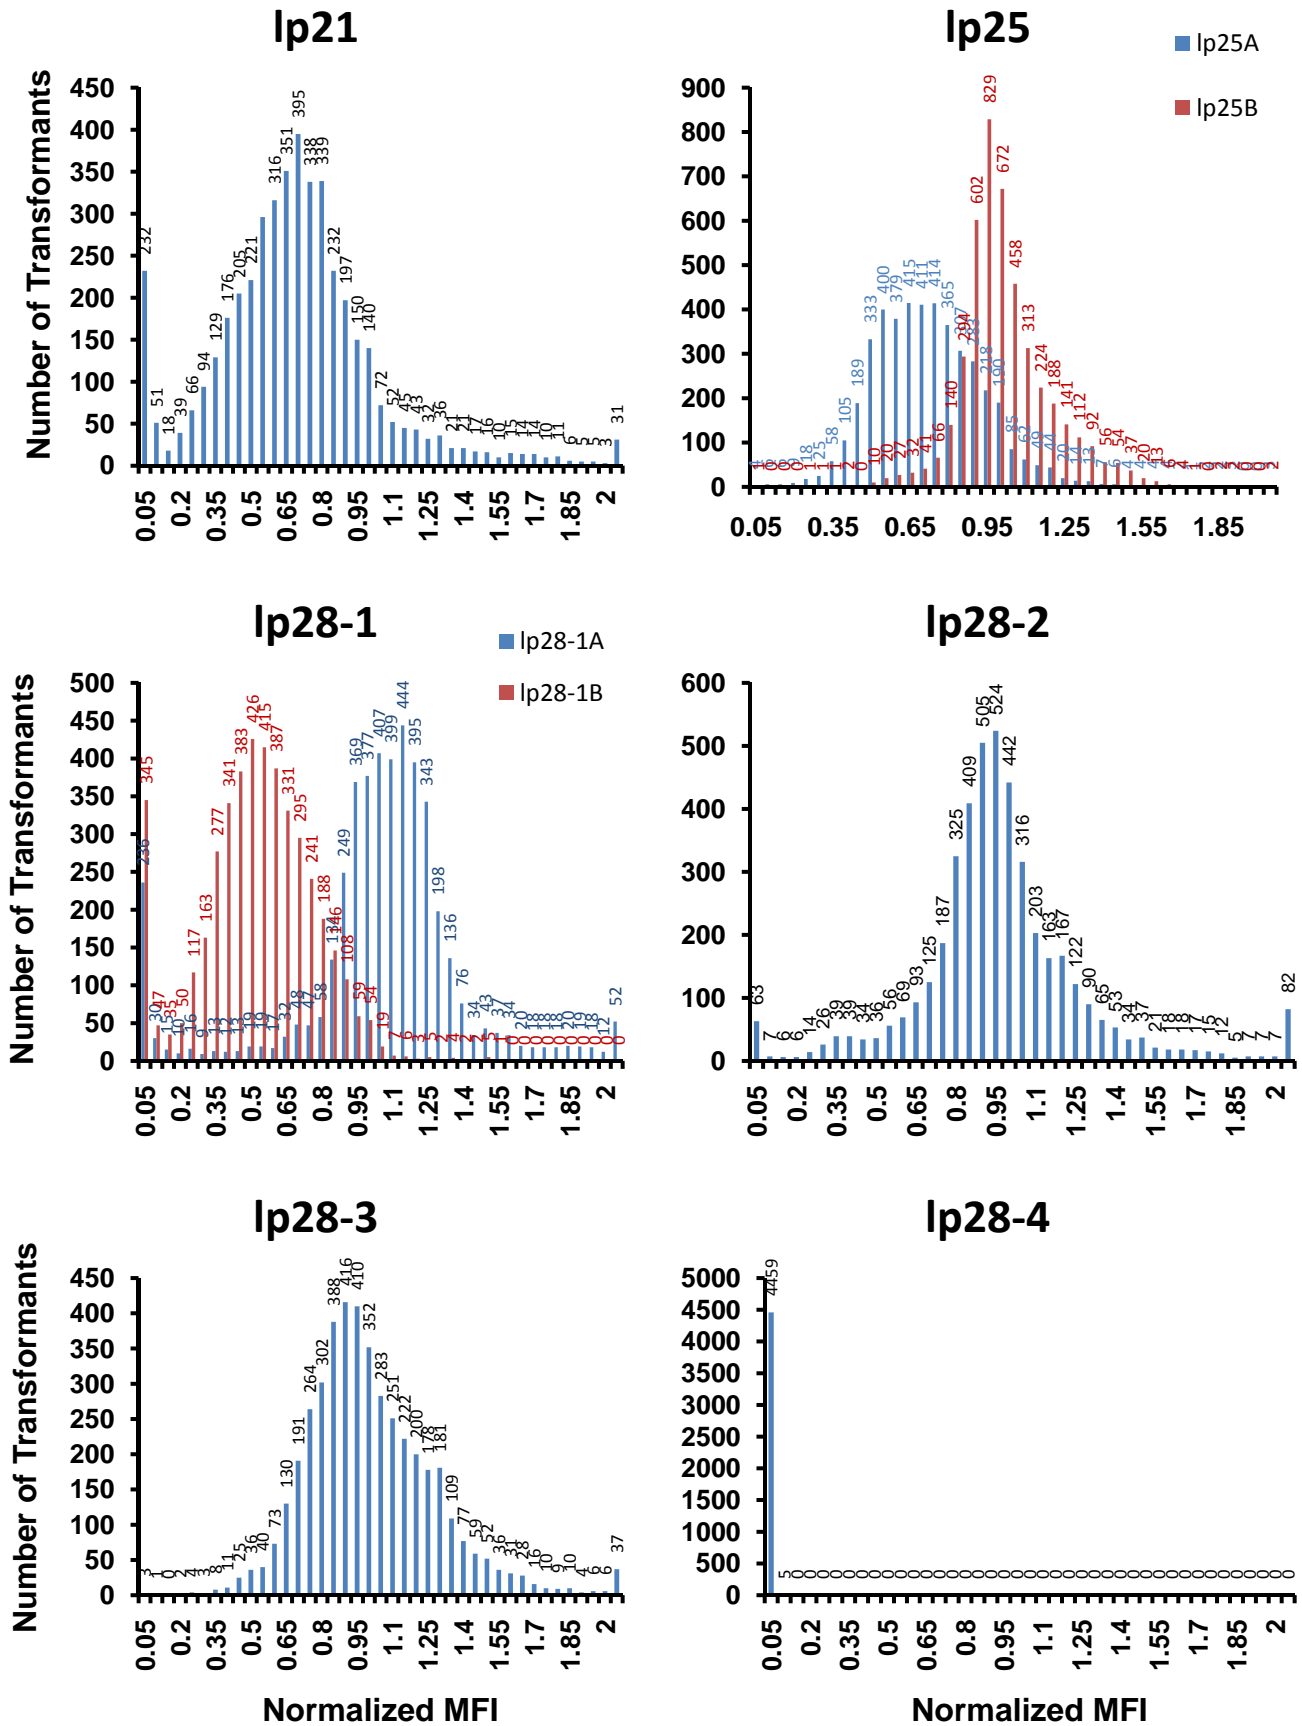

Fig. S1 (cont.)

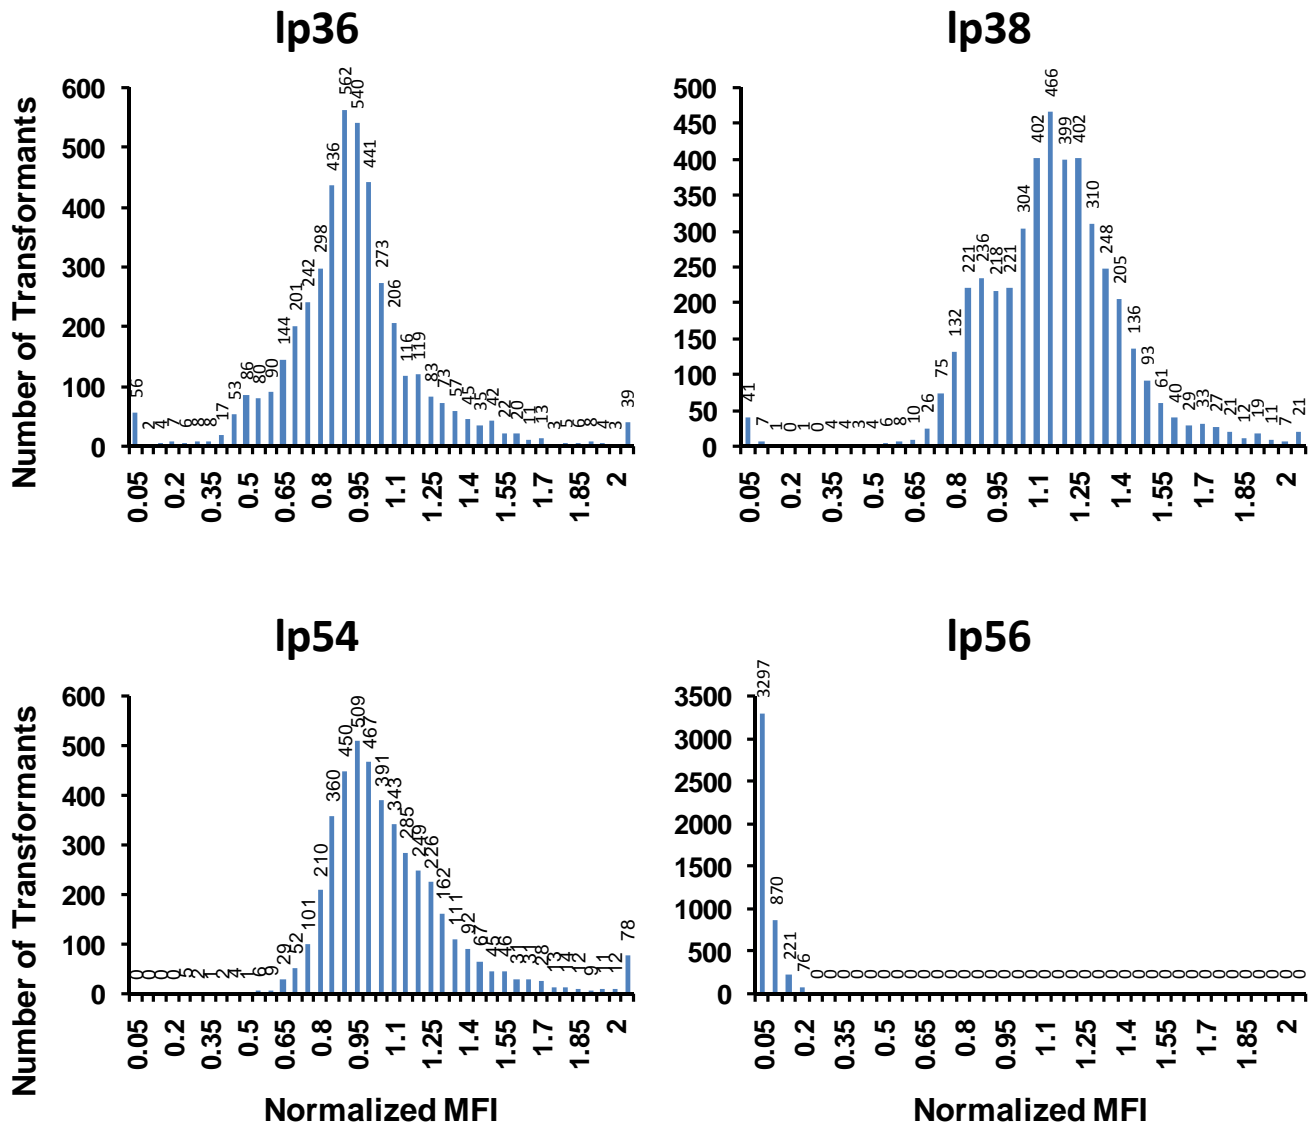

**Figure S1.** Histograms showing distribution of normalized MFI values for 4464 STM mutants. Each transformant was subjected to the LPAA and the MFI value for each replicon was normalized by dividing by the RPP MFI. Each bar (and the number above it) corresponds to the number of clones with a normalized MFI value in a 0.05 range (e.g. 0-0.05); the last bar represents those clones with normalized MFI values >2.0. MFI values for lp5 were normalized using the median of the five greatest MFI values from each assay plate as described in the text.



Fig. S2

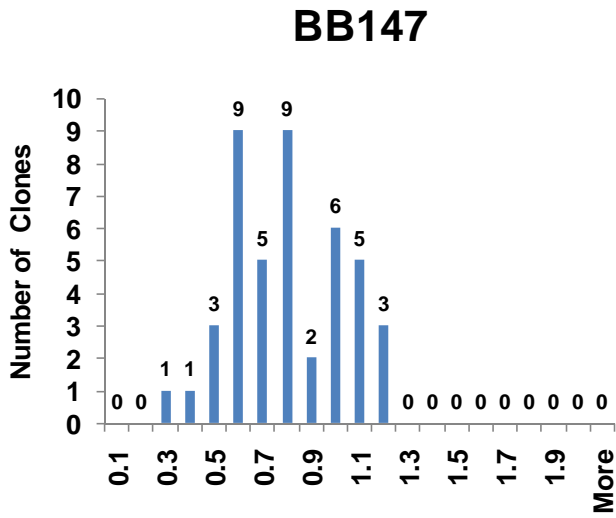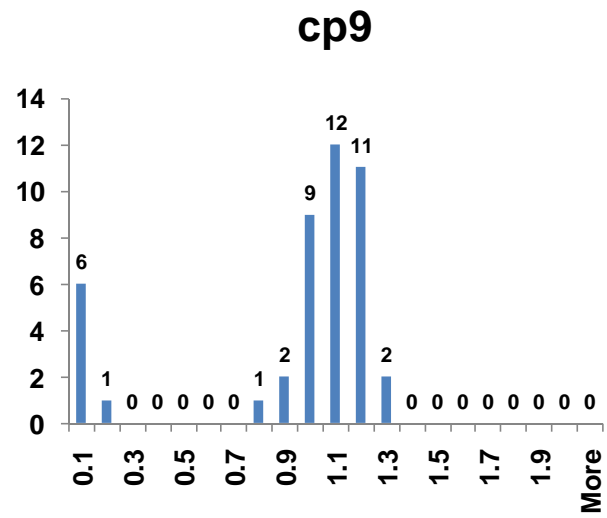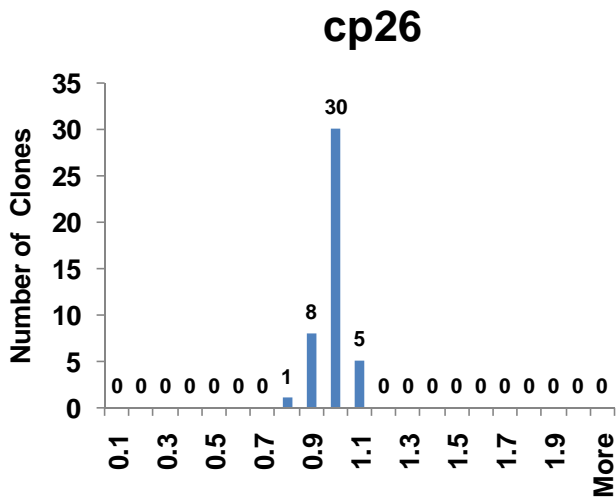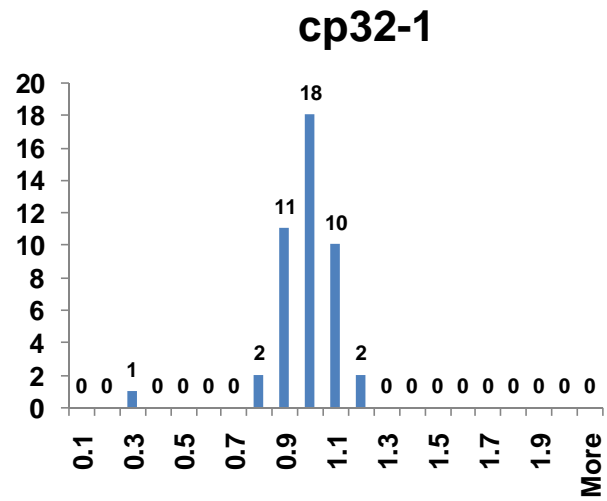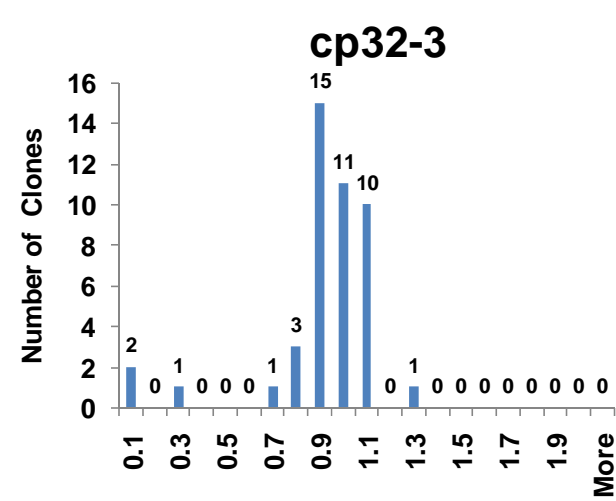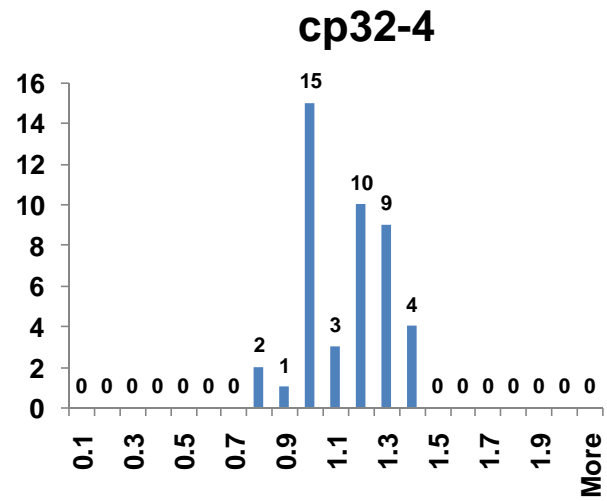

Normalized MFI

Normalized MFI

Fig. S2 (cont.)

**cp32-6**

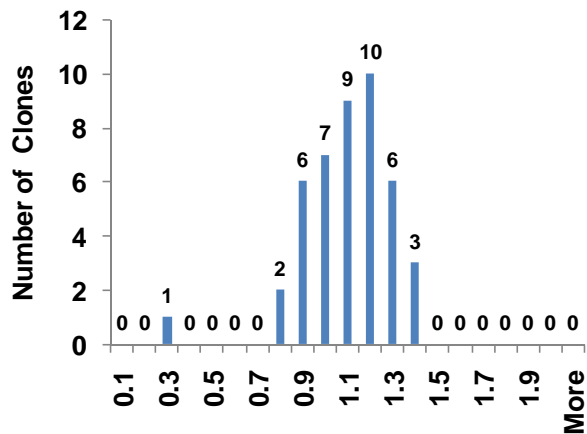

**cp32-7**

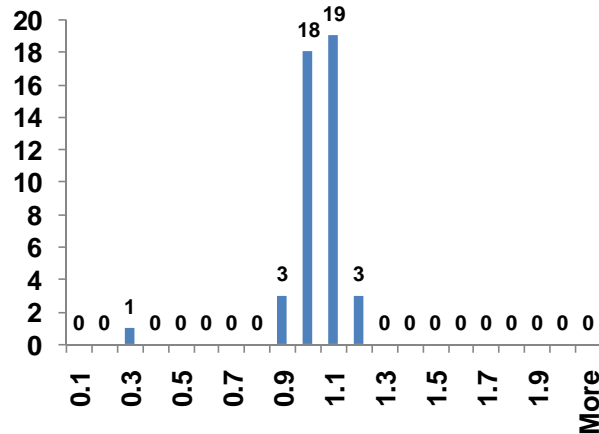

**cp32-8**

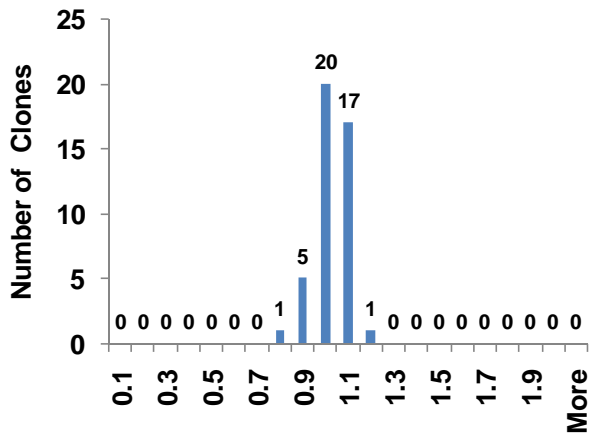

**cp32-9**

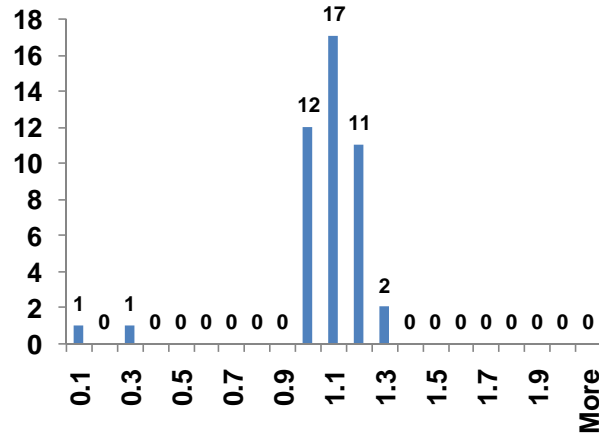

**lp5**

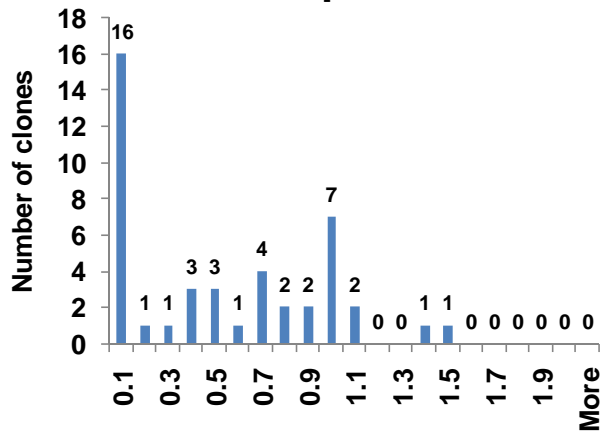

**lp17**

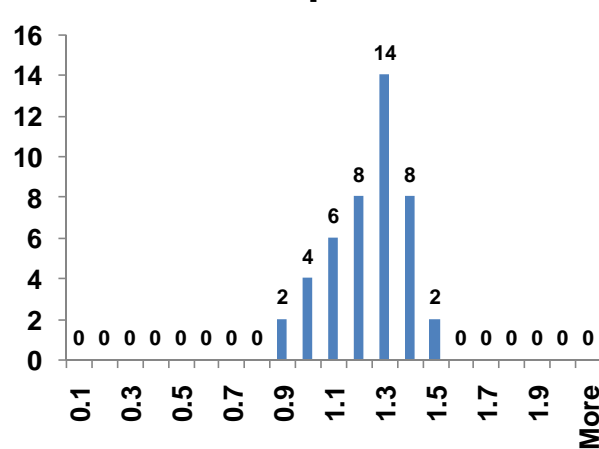

Normalized MFI

Normalized MFI

Fig. S2 (cont.)

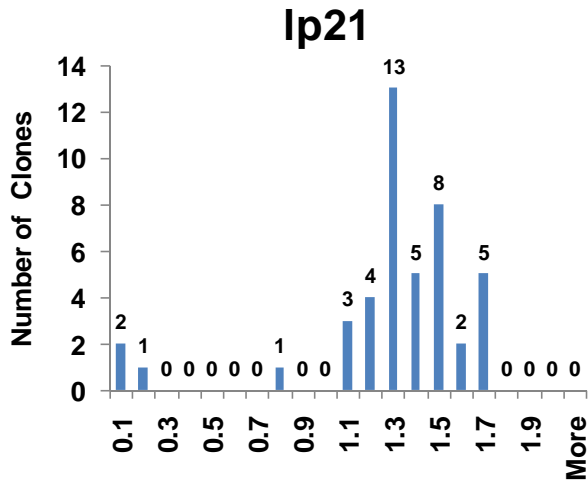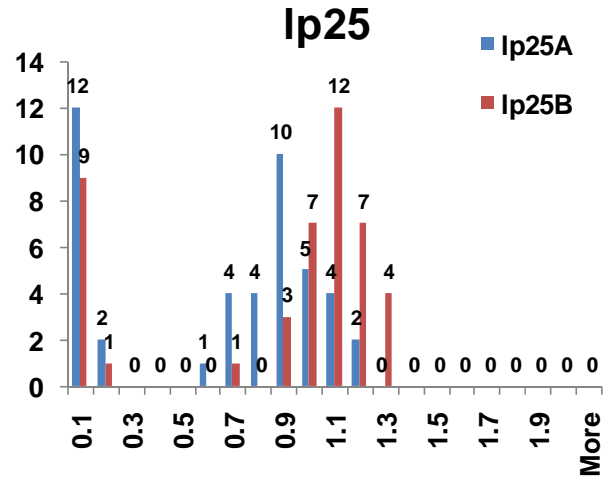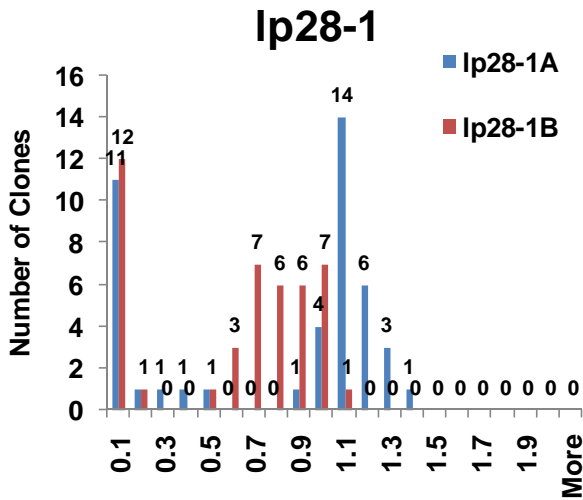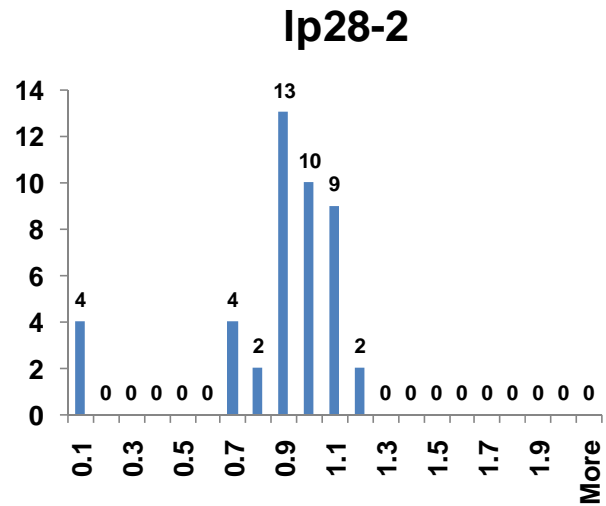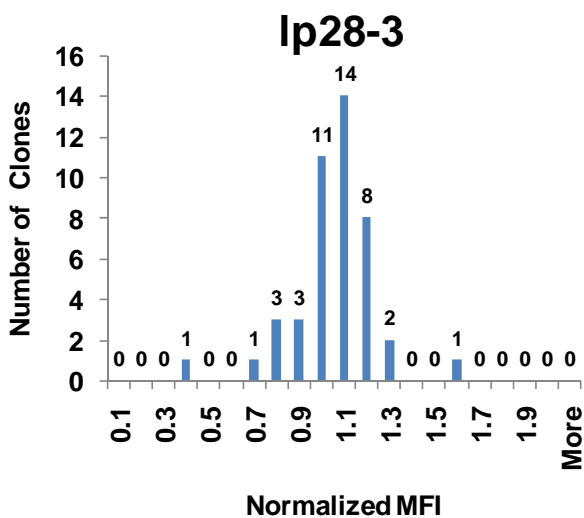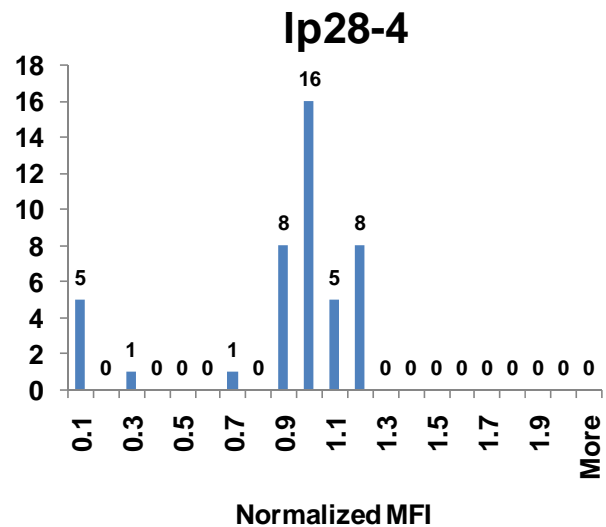

Fig. S2 (cont.)

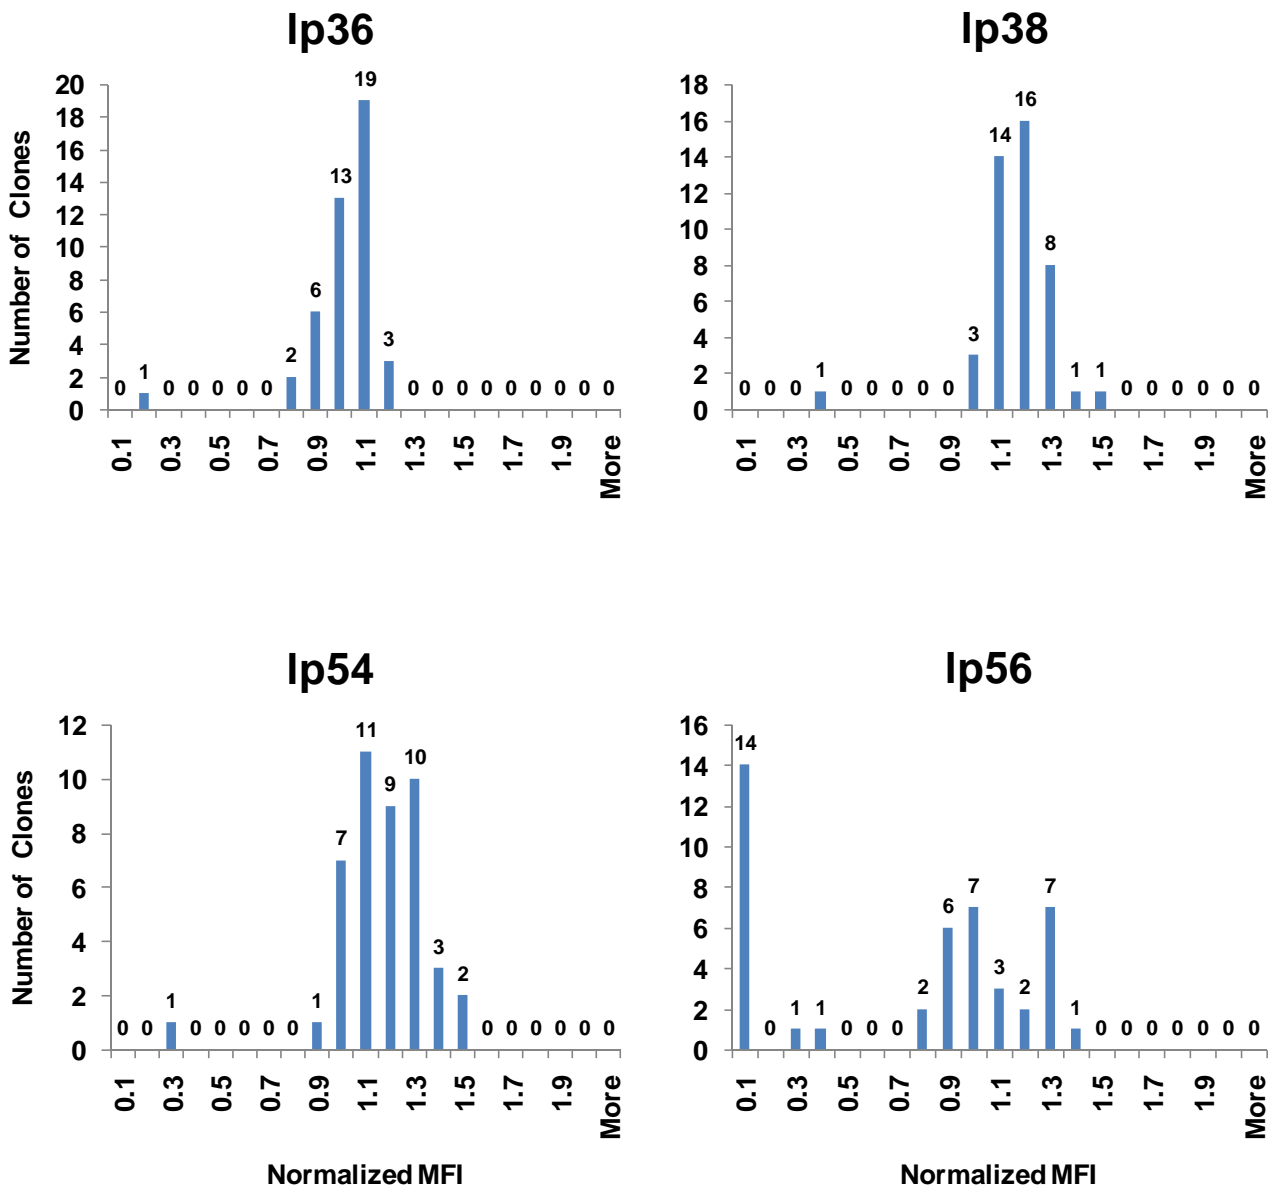

**Figure S2.** Histograms showing distribution of normalized MFI values for 44 B31 clones. Each clone was subjected to the LPAA and the MFI value for each replicon was normalized by dividing by the MFI value for the RPP. Each bar (and the number above it) corresponds to the number of clones with a normalized MFI value in a 0.1 range (e.g. 0-0.1). MFI values for Ip5 were normalized using the median of the five greatest MFI values from each assay plate as described in the text.

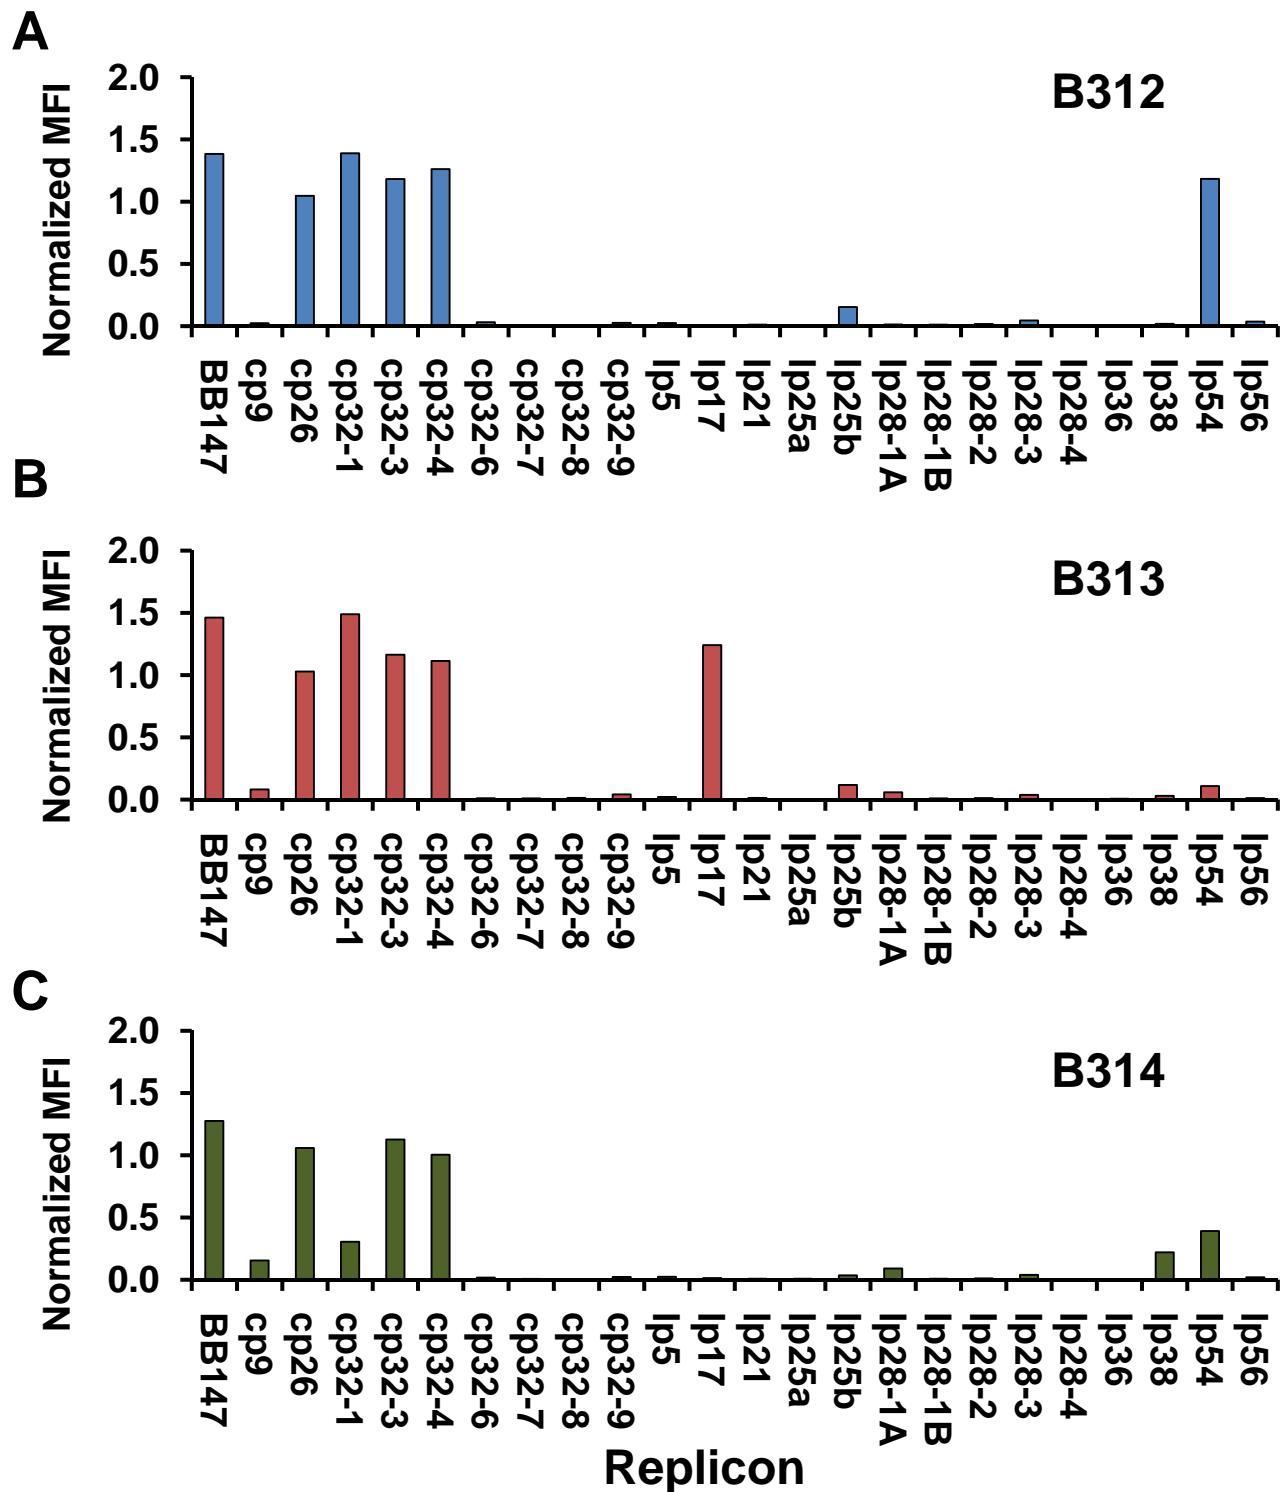

**Figure S3.** Plasmid content analysis of high passage *B. burgdorferi* strains using the Luminex® Assay. A scraping of frozen stock of the indicated strains were used as template for Luminex® plasmid analysis. Median fluorescence intensity (MFI) obtained for each *B. burgdorferi* replicon was normalized by dividing culture MFI values by RPP MFI values. (A) B312 (B) B313 (C) B314.
